# Supplementary figures and images for: Network analysis of metabolic enzyme evolution in Escherichia coli
Source: Springer Nature journal article supplement (doi:10.1186/1471-2105-5-15), 2004-02-18

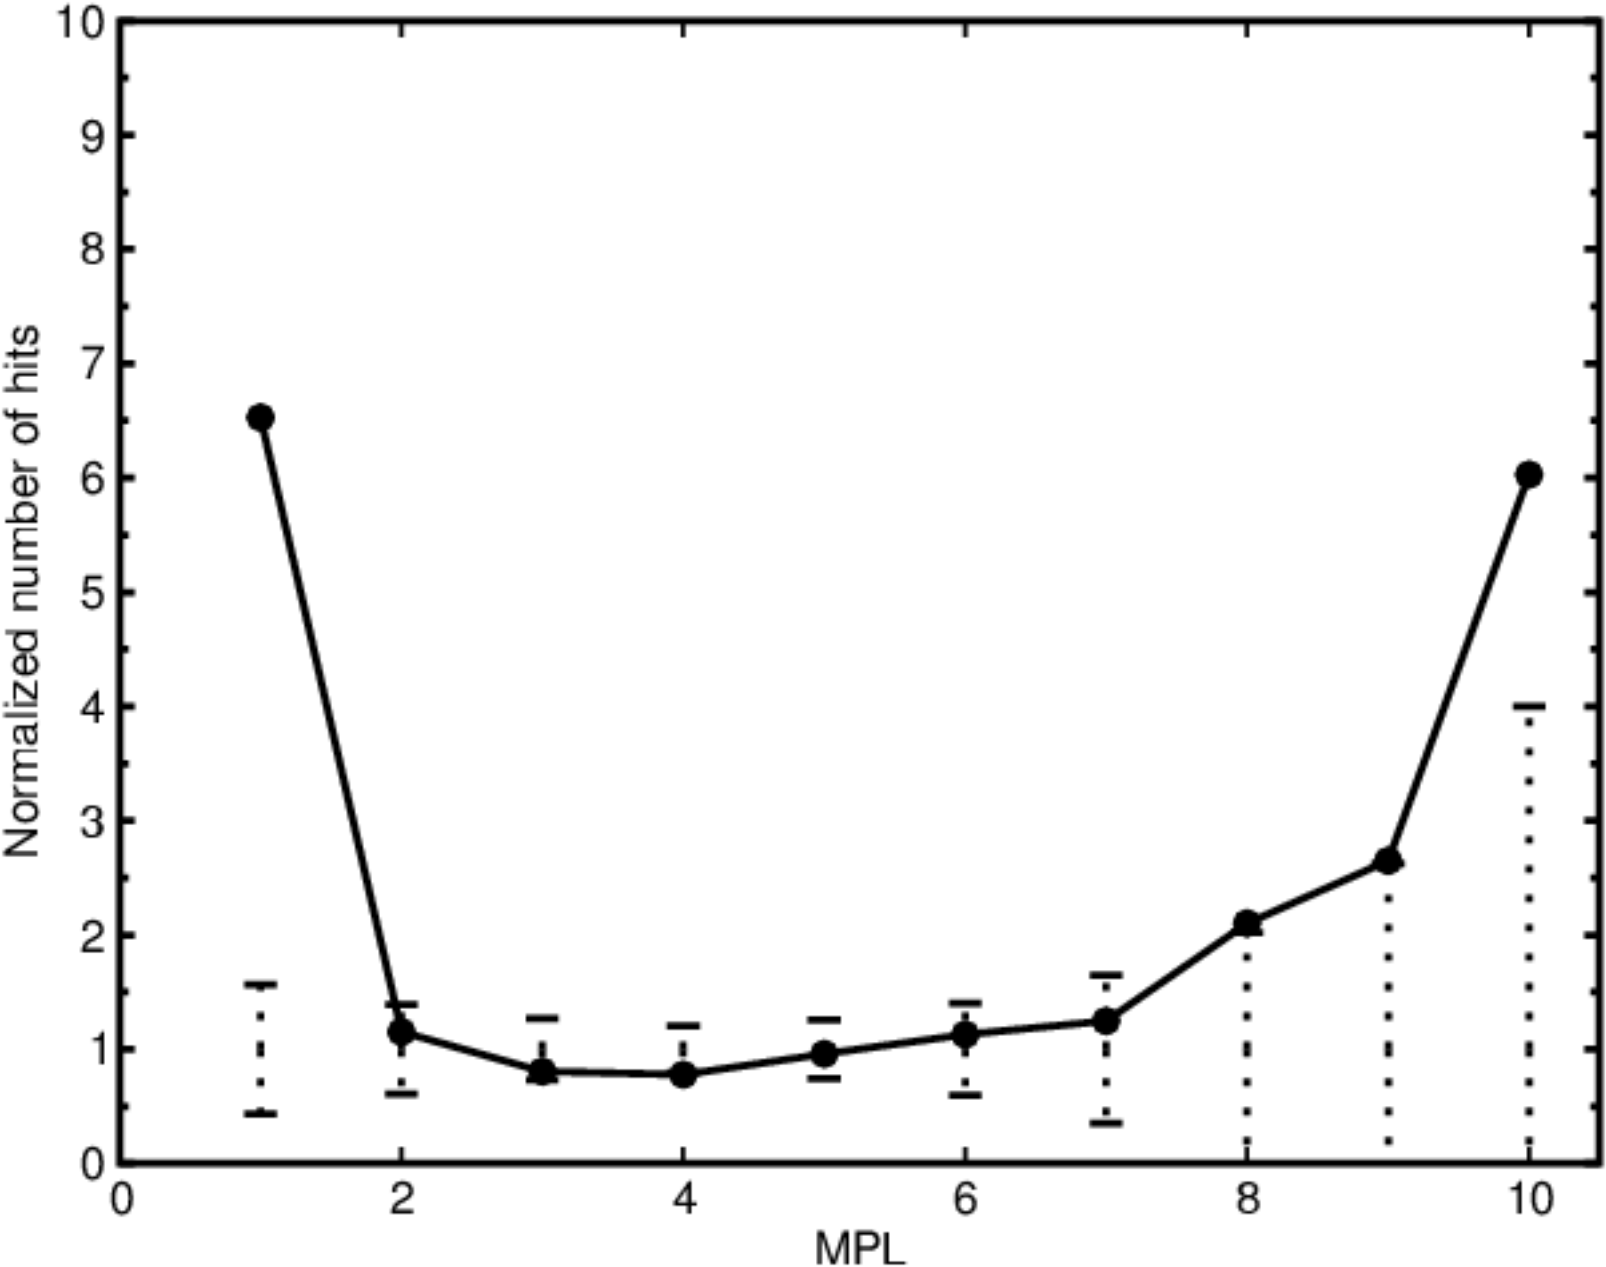

Supplement: 12859_2003_131_MOESM11_ESM.pdf [file 12859_2003_131_MOESM11_ESM.pdf]

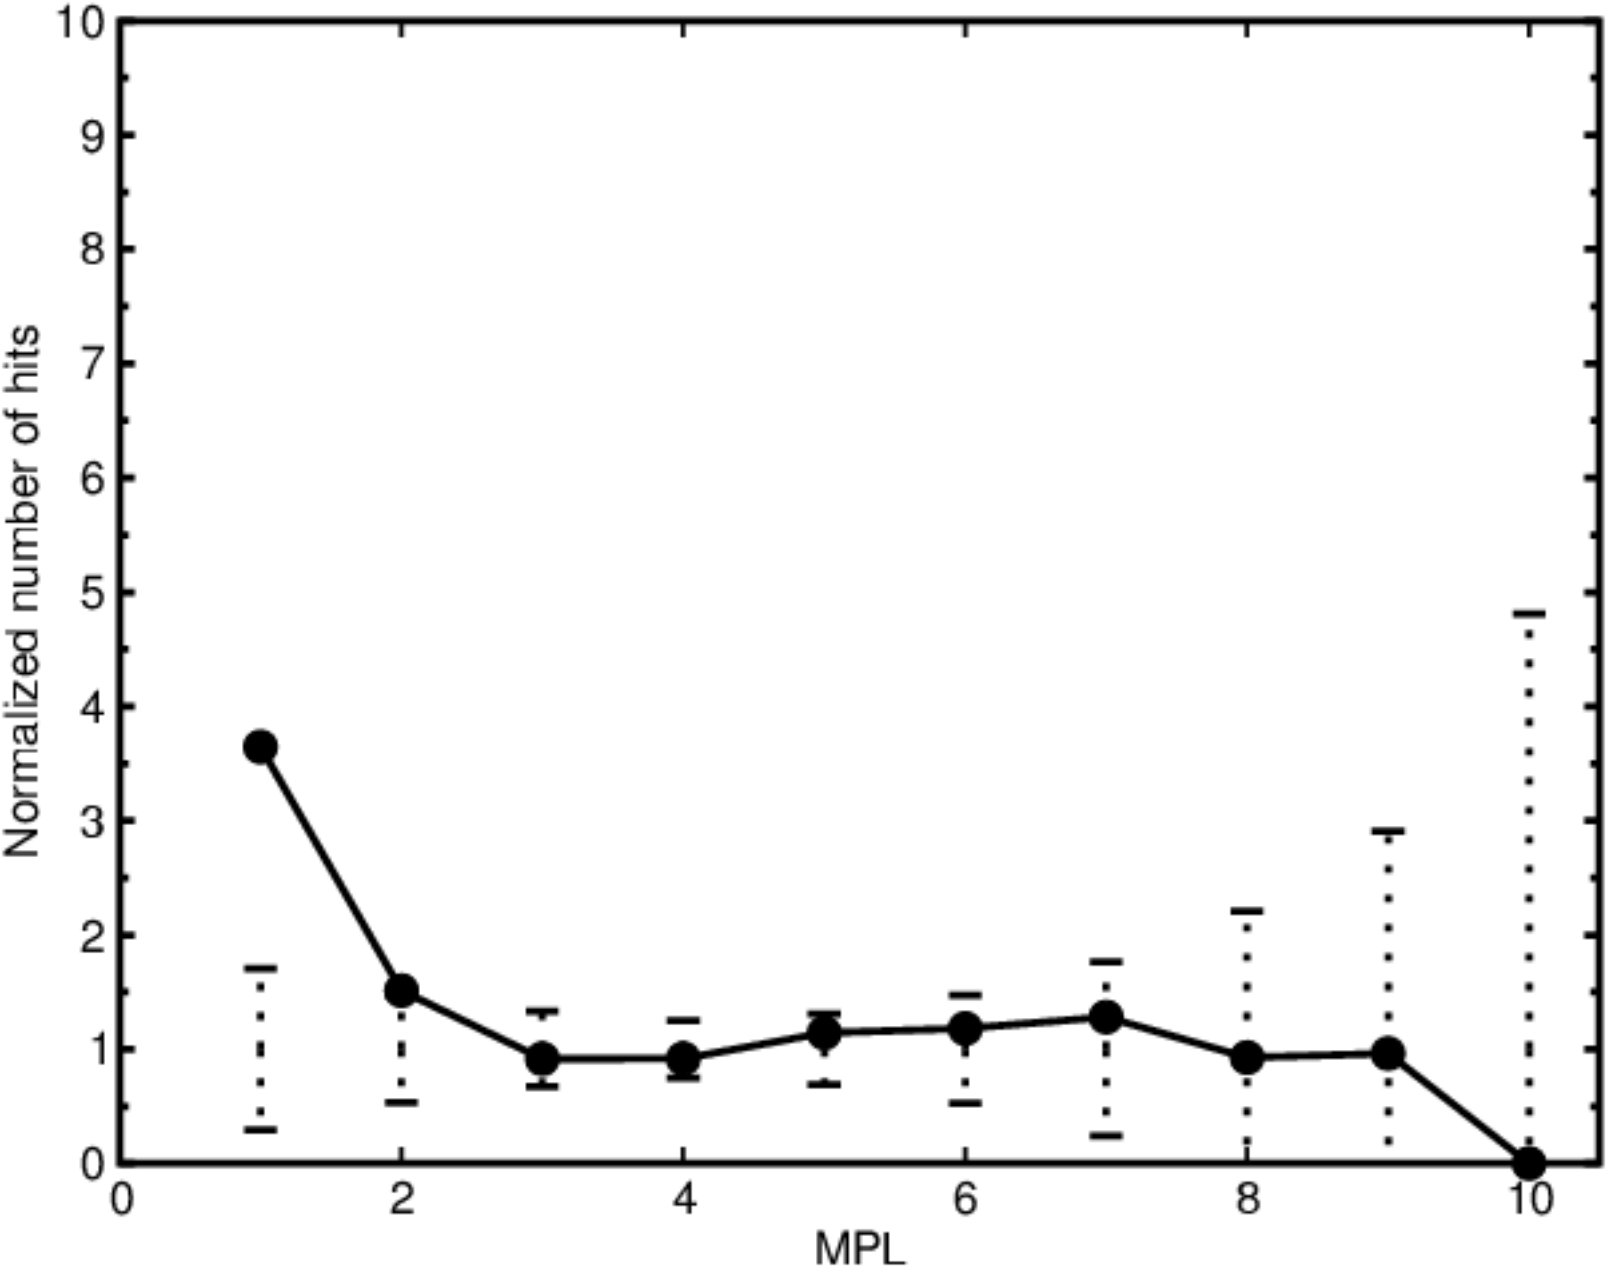

Supplement: 12859_2003_131_MOESM12_ESM.pdf [file 12859_2003_131_MOESM12_ESM.pdf]

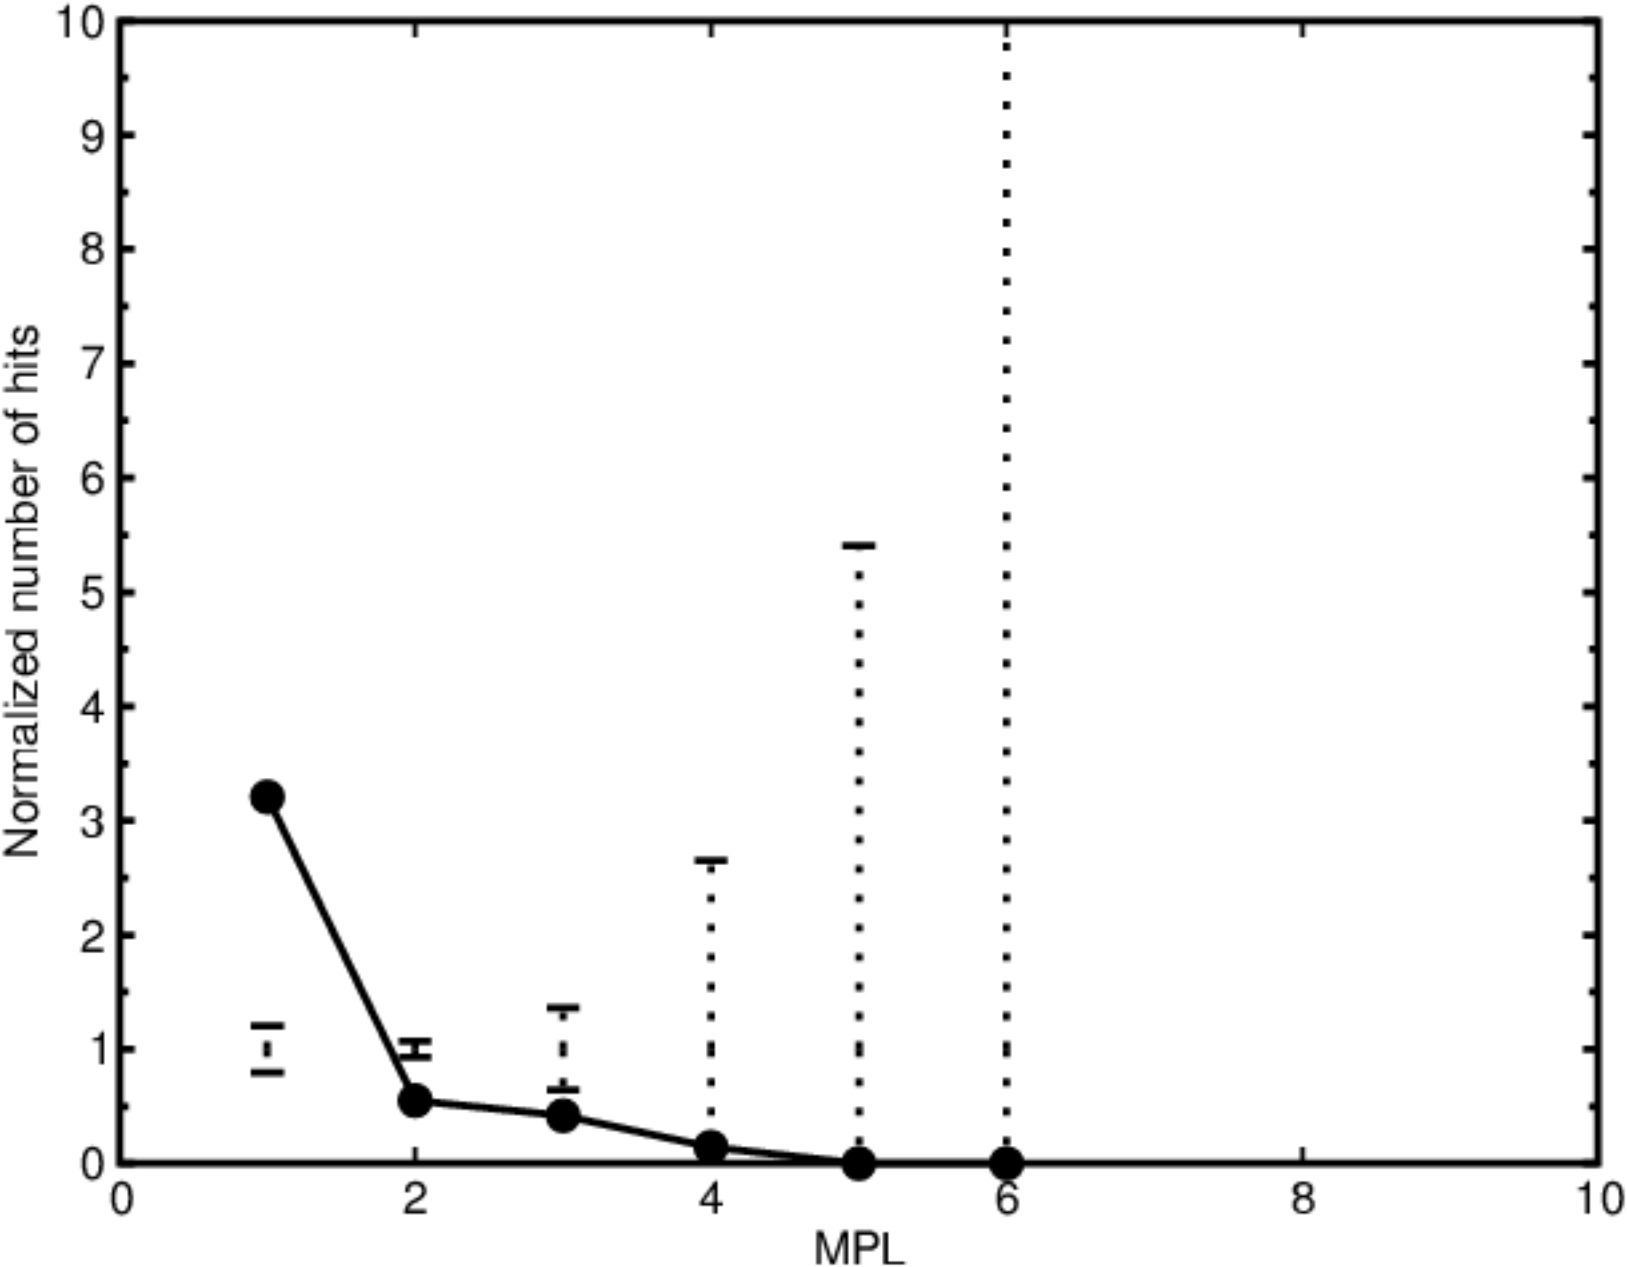

Supplement: 12859_2003_131_MOESM8_ESM.pdf [file 12859_2003_131_MOESM8_ESM.pdf]

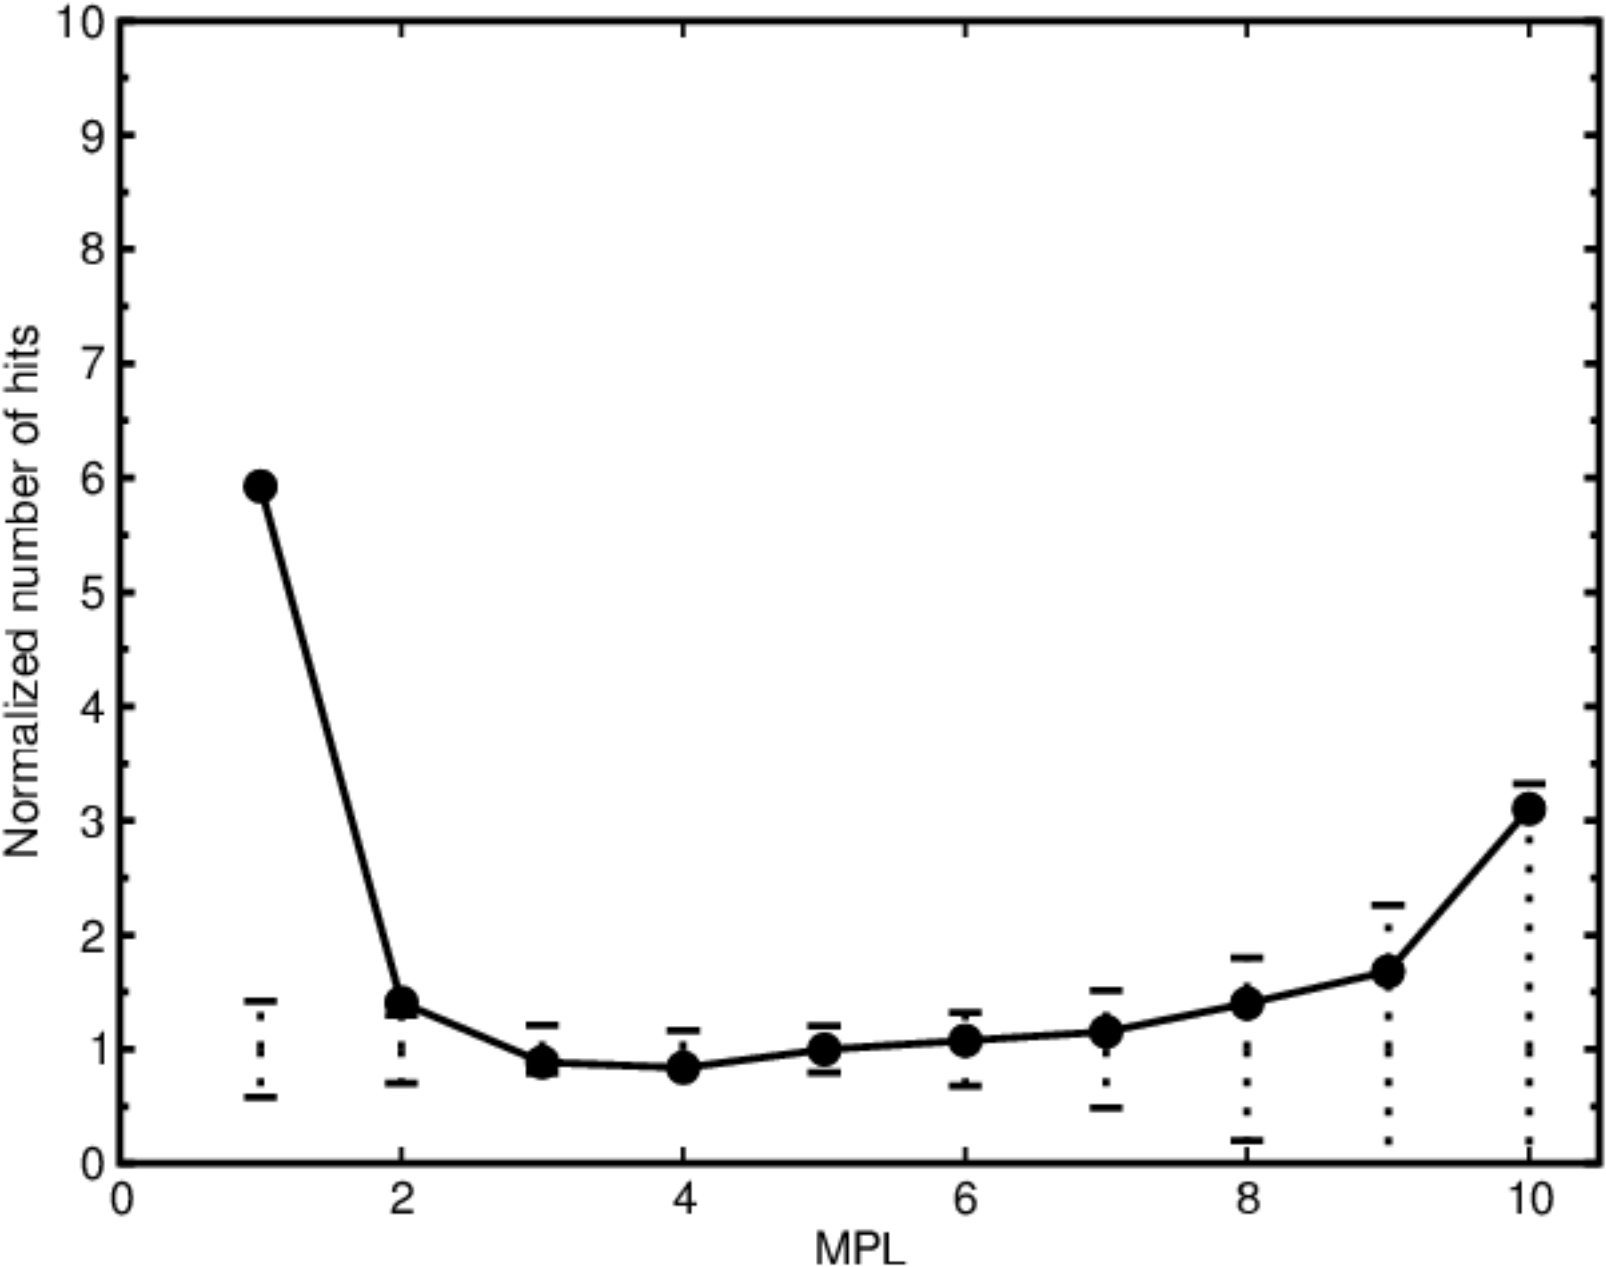

Supplement: 12859_2003_131_MOESM9_ESM.pdf [file 12859_2003_131_MOESM9_ESM.pdf]
